# Supplementary material for: Drug-Loaded Biomimetic Ceramics for Tissue Engineering
Source: Pharmaceutics. 2018 Dec 13;10(4):272. doi: 10.3390/pharmaceutics10040272 (PMC6321415; doi:10.3390/pharmaceutics10040272)
Supplement: Supplementary file 1 [file pharmaceutics-10-00272-s001.pdf]

# Supplementary Materials: Drug-Loaded Biomimetic Ceramics for Tissue Engineering

Patricia Diaz-Rodriguez, Mirian Sánchez and Mariana Landin

**Table S1.** Summary of the developed drug loaded biomimetic bioceramics.

| Biomaterial                                 | Loading technique            | Drug                      | Release profile                                          | Reference |
|---------------------------------------------|------------------------------|---------------------------|----------------------------------------------------------|-----------|
| HAp powder                                  | Adsorption                   | Ibuprofen                 | Fickian diffusion                                        | [80]      |
| TCP/bioactive glasses                       | Adsorption                   | BMP-2                     | Initial burst followed by a prolonged release            | [82]      |
| Gelatin/HAp cryogel                         | Adsorption by microinjection | VEGF                      | Initial burst followed by a prolonged release            | [83]      |
| BoneSave granules (BCP)                     | Adsorption                   | Zoledronic acid           | Initial burst followed by a prolonged release            | [84]      |
| Biomorphic silicon carbide(BioSiC)          | Adsorption                   | VEGF                      | Initial burst followed by a prolonged release            | [86]      |
| HAp and $\alpha$ -TCP                       | Adsorption                   | BMP-2, bFGF               | -                                                        | [87]      |
| TCP/HAp granules.                           | Adsorption                   | BMP-2                     | Release for up to 14 days                                | [88]      |
| HAp/Collagen nanocomposite fibers           | Adsorption                   | BMP-2                     | Initial burst followed by a prolonged release            | [89]      |
| Collagen-HAp                                | Adsorption                   | Pamidronate, BMP-2        | BMP-2 initial burst followed by a prolonged release      | [90]      |
| Biomorphic silicon carbide(BioSiC)          | Adsorption                   | Vancomycin                | Initial burst followed by a prolonged release            | [91,92]   |
| Mesoporous HAp microspheres                 | Adsorption                   | Doxorubicin hydrochloride | Two phase release controlled by pH                       | [94]      |
| HAp nanoparticles                           | Adsorption                   | IgG                       | -                                                        | [96]      |
| HAp nanoparticles                           | Adsorption                   | BMP-2                     | Two phase release profile                                | [98]      |
| Nanocrystalline calcium phosphate apatite   | Adsorption                   | Erythrosin                | Two phase release profile                                | [99]      |
| BCP                                         | Adsorption                   | fibronectin/cadherin      | Two phase release profile                                | [102]     |
| Gelatin-carboxymethyl cellulose/CaP         | Physical entrapment          | Dextran (model drug)      | Zero order release                                       | [51]      |
| Alginate+nano-HAp/collagen                  | Physical entrapment          | BMP-2                     | Zero order release                                       | [103]     |
| Gelatin-HAp nanocomposites                  | Physical entrapment          | Tetracycline              | Zero order release                                       | [104]     |
| Calcium phosphate coatings of Ti            | Physical entrapment          | BSA (model protein)       | Two phase release profile dependent on BSA content       | [105]     |
| Calcium phosphate coatings of Ti            | Physical entrapment          | BSA (model protein)       | Release profile dependent on BSA incorporation technique | [106]     |
| Apatitic bone cement                        | Physical entrapment          | Strontium                 | Zero order release                                       | [29]      |
| Calcium phosphate porous microspheres       | Physical entrapment          | Strontium                 | -                                                        | [93]      |
|                                             | Adsorption                   | Vancomycin                | Higuchi release profile                                  |           |
| Gelatin/collagen and bioactive glass fibers | Physical entrapment          | Copper                    | -                                                        | [62]      |
| Mg and CO <sub>3</sub> doped apatite        | Physical entrapment          | Strontium, Magnesium      | Zero order release                                       | [107]     |

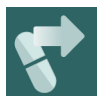

|                                  |                     |                          |                       |       |
|----------------------------------|---------------------|--------------------------|-----------------------|-------|
| Bioglass microspheres            | Physical entrapment | Strontium, Zinc, Silicon | Burst release profile | [108] |
| Complex-shaped HAp scaffolds     | Physical entrapment | Lysozyme, BSA            | Burst release profile | [110] |
| Chitosan/HAp scaffolds           | Covalent bonding    | BMP2-derived peptide P24 | Zero order release    | [111] |
| electrospun poly (L-lactide)/HAp | Covalent bonding    | Arg–Gly–Asp (RGD)        | -                     | [113] |
